# Supplementary material for: Anchoring carbon layers and oxygen vacancies endow WO3−x/C electrode with high specific capacity and rate performance for supercapacitors
Source: Royal Society of Chemistry journal article supplement (doi:10.1039/c9ra03886h), 2019-01-01
Supplement: c9ra03886h1.pdf [file c9ra03886h1.pdf]

**Supplementary material**

**Anchoring Carbon Layers and Oxygen Vacancies  
enable  $\text{WO}_{3-x}/\text{C}$  Electrode with High Specific  
Capacity and Rate Performance for Supercapacitor**

Juan Xu,\* Chongyang Li, Lulu Chen, Zhongyang Li, Pibin Bing,

*North China University of Water Resources and Electric Power, Zhengzhou 450000,*

*China*

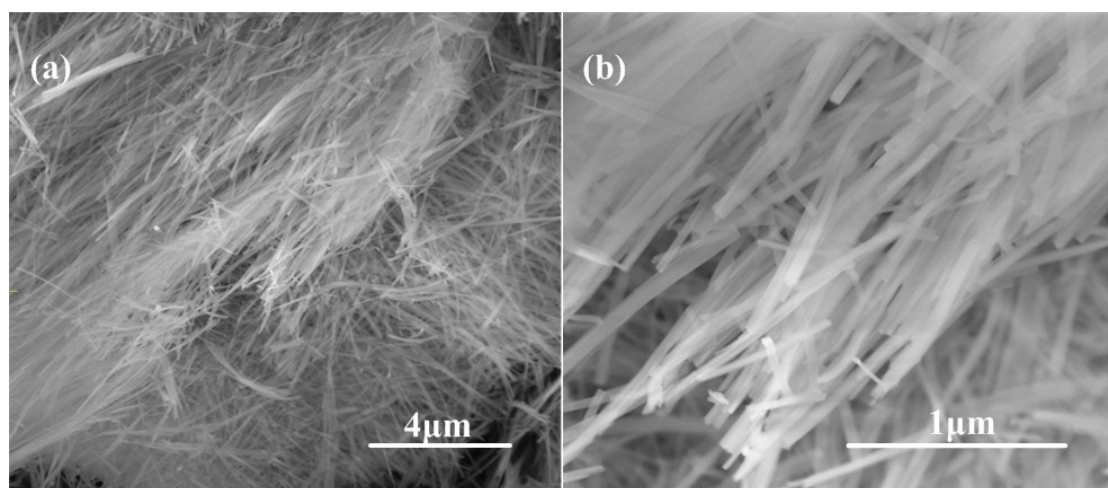

Figure S1. (a, b) SEM images of different magnifications of  $\text{WO}_3$ -EDA organic-inorganic hybrid precursor.

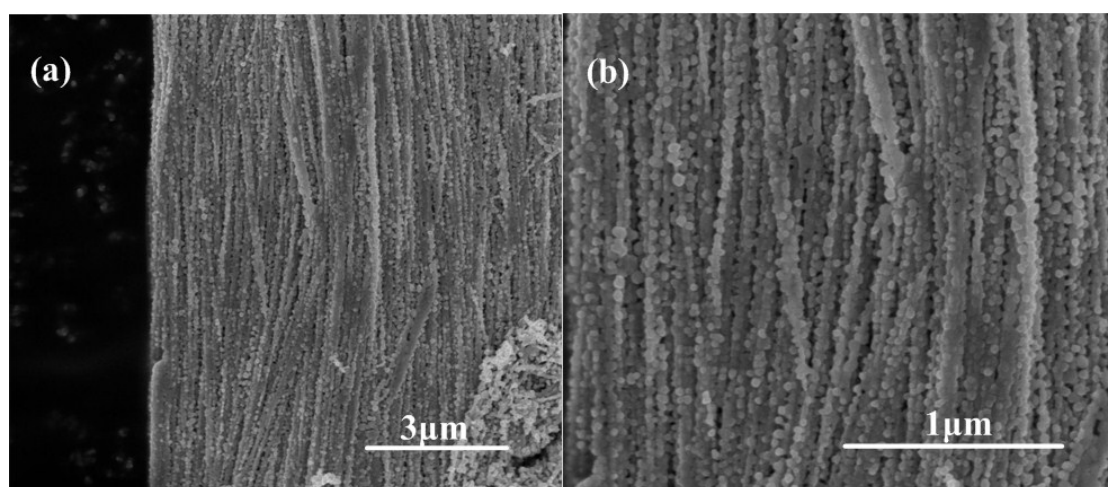

Figure S2. (a, b) SEM images of different magnifications of pure  $\text{WO}_3$  nanowires

which achieved by annealing the carbon layers anchored  $\text{WO}_{3-x}$  nanowires in air.

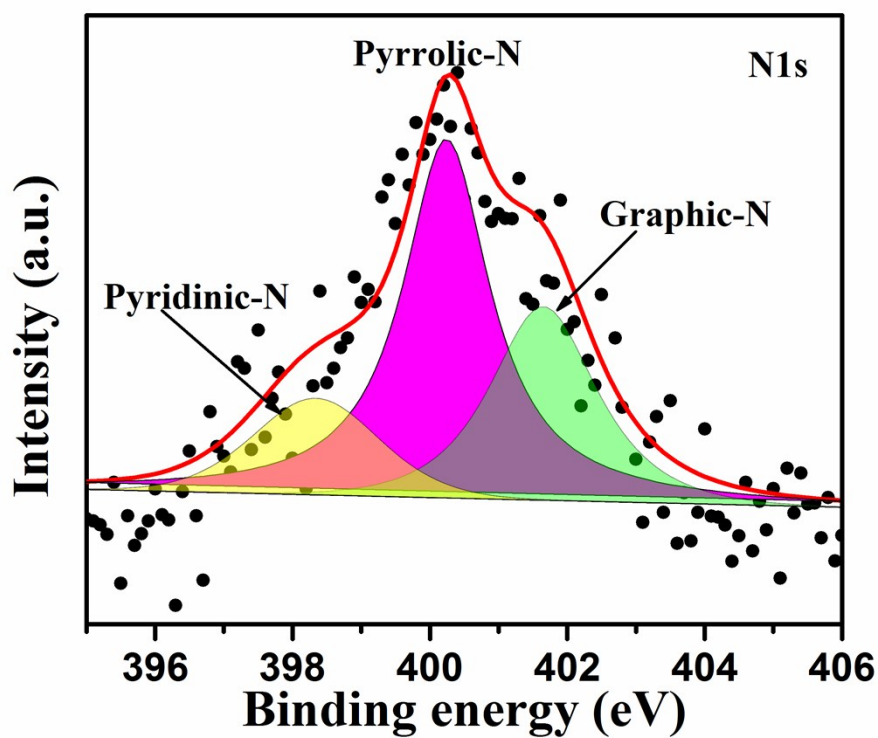

Figure S3. High-resolution N1s spectrum of the carbon layers anchored  $\text{WO}_{3-x}$  nanowires.
